# Supplementary material
Source: Springer Nature journal article supplement (https://www.springermedizin.de/resource/supplementary/12885_2009_1881_MOESM1_ESM.pdf/9461476)

**Fold difference**

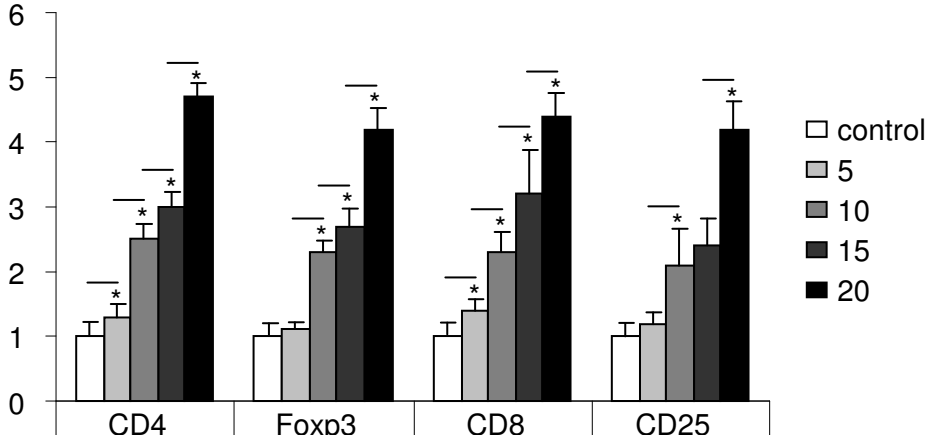

|                       |          |          |          |          |
|-----------------------|----------|----------|----------|----------|
| □ normal liver tissue | 1.0±0.2  | 1.0±0.21 | 1.0±0.17 | 1.0±0.19 |
| □ 5                   | 1.3±0.19 | 1.1±0.10 | 1.4±0.18 | 1.2±0.17 |
| ■ 10                  | 2.5±0.25 | 2.3±0.19 | 2.3±0.30 | 2.1±0.55 |
| ■ 15                  | 3.0±0.23 | 2.7±0.26 | 3.2±0.69 | 2.4±0.40 |
| ■ 20                  | 4.7±0.21 | 4.2±0.33 | 4.4±0.34 | 4.2±0.42 |

**positive cells [%]**

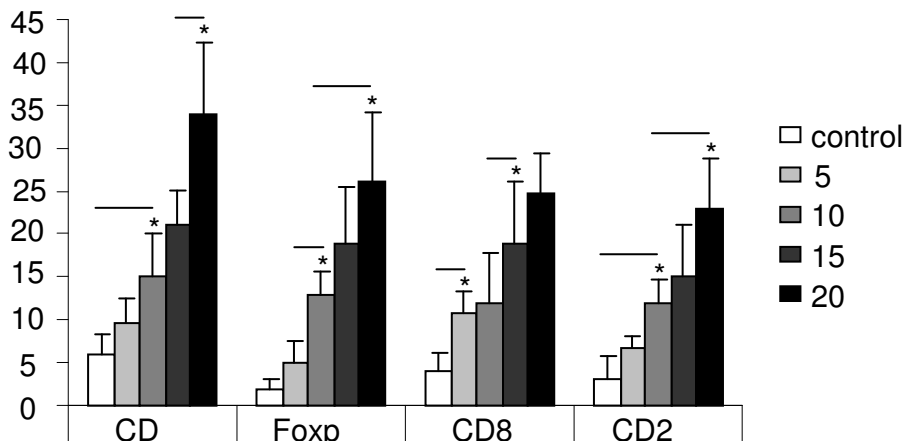

|                       |       |       |       |       |
|-----------------------|-------|-------|-------|-------|
| □ normal liver tissue | 6±2.  | 2±1.  | 4±2.  | 3±2.  |
| □ 5                   | 10±2. | 5±2.  | 11±2. | 7±1.  |
| ■ 10                  | 15±5. | 13±2. | 12±5. | 12±2. |
| ■ 15                  | 21±4. | 19±6. | 19±6. | 15±6. |
| ■ 20                  | 34±8. | 26±8. | 25±4. | 23±5. |

Supplement: MOESM1 [file 9461476]
